# Supplementary material
Source: HighWire-hosted journal article supplement (https://erj.ersjournals.com/content/54/6/1901188)
Supplement: inline-supplementary-material-1 [file inline-supplementary-material-1.pdf]

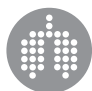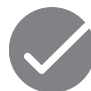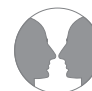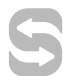

SHAREABLE PDF

# Concomitant medications and clinical outcomes in idiopathic pulmonary fibrosis

Michael Kreuter<sup>1</sup>, David J. Lederer<sup>2</sup>, Vincent Cottin<sup>3</sup>, Nicolas Kahn<sup>1</sup>, Brett Ley<sup>4</sup>, Carlo Vancheri<sup>5</sup>, Derek Weycker<sup>6</sup>, Mark Atwood<sup>6</sup>, Klaus-Uwe Kirchgaessler<sup>7</sup> and Christopher J. Ryerson<sup>8</sup>

**Affiliations:** <sup>1</sup>Center for Interstitial and Rare Lung Diseases, Pneumology, Thoraxklinik, University of Heidelberg, Member of the German Center for Lung Research, Heidelberg, Germany. <sup>2</sup>Depts of Medicine and Epidemiology, Columbia University Irving Medical Center, New York, NY, USA. <sup>3</sup>Dept of Respiratory Medicine, Reference Center for Rare Pulmonary Diseases, Louis Pradel Hospital, Claude Bernard University Lyon 1, UMR754, Lyon, France. <sup>4</sup>Dept of Medicine, University of California, San Francisco, San Francisco, CA, USA. <sup>5</sup>Dept of Clinical and Experimental Medicine, University of Catania, Catania, Italy. <sup>6</sup>Policy Analysis Inc. (PAI), Brookline, MA, USA. <sup>7</sup>F. Hoffmann-La Roche Ltd, Basel, Switzerland. <sup>8</sup>Dept of Medicine, University of British Columbia, Vancouver, BC, Canada.

**Correspondence:** Michael Kreuter, Center for Interstitial and Rare Lung Disease, Thoraxklinik, Heidelberg University Hospital, Röntgenstraße 1, 69120 Heidelberg, Germany. E-mail: michael.kreuter@med.uni-heidelberg.de

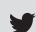

@ERSpublications

**This *post hoc* exploratory analysis found no clear associations between frequently used concomitant medication combinations and disease progression in 1450 patients with IPF enrolled in phase III trials, but several combinations may require further study.** <http://bit.ly/2ZzyMXR>

**Cite this article as:** Kreuter M, Lederer DJ, Cottin V, *et al.* Concomitant medications and clinical outcomes in idiopathic pulmonary fibrosis. *Eur Respir J* 2019; 54: 1901188 [<https://doi.org/10.1183/13993003.01188-2019>].

This single-page version can be shared freely online.

## To the Editor:

Patients with idiopathic pulmonary fibrosis (IPF) frequently have a substantial burden of comorbidities [1]. Antifibrotic therapy is recommended to slow the progression of IPF [2]. Patients receiving antifibrotic therapy frequently receive concomitant medications for the management of comorbidities [1, 3–9]. Previous *post hoc* analyses of antacids, statins, metformin, anticoagulants and angiotensin modulators in patients with IPF enrolled in phase III randomised controlled trials (RCTs) have generated hypotheses on the impact of these treatments on IPF outcomes [3–9]. The effects of multiple concomitant medications in patients with IPF have been largely unexplored. The objective of the present analyses was to explore the association between use of combinations of frequently prescribed concomitant medications and disease outcomes in patients with IPF.
